# Supplementary material for: Analysis of endothelial-to-haematopoietic transition at the single cell level identifies cell cycle regulation as a driver of differentiation
Source: PubMed Central journal article supplement (PMC7329542; doi:10.1186/s13059-020-02058-4), 2020-07-01
Supplement: 13059_2020_2058_MOESM2_ESM.pdf [file 13059_2020_2058_MOESM2_ESM.pdf]

**Table S1 GO terms for CDK4/6i differentially expressed genes in the endothelial cluster.**

| Endothelial cluster   CDK4/6i downregulated genes   GO Biological Process      |         |                  |         |                |
|--------------------------------------------------------------------------------|---------|------------------|---------|----------------|
| Name                                                                           | p-value | adjusted p-value | z score | combined score |
| ribosomal small subunit export from nucleus (GO:0000056)                       | 0.00698 | 0.05914          | -4.17   | 20.7           |
| mitochondrial ATP synthesis coupled proton transport (GO:0042776)              | 0.02178 | 0.07542          | -4.96   | 18.99          |
| mitochondrial electron transport, NADH to ubiquinone (GO:0006120)              | 0.001   | 0.04224          | -2.73   | 18.88          |
| mitochondrial ATP synthesis coupled electron transport (GO:0042775)            | 8.3E-05 | 0.006288         | -1.9    | 17.87          |
| viral process (GO:0016032)                                                     | 6.1E-05 | 0.006288         | -1.7    | 16.45          |
| response to type I interferon (GO:0034340)                                     | 0.00797 | 0.05914          | -2.97   | 14.36          |
| positive regulation of apoptotic cell clearance (GO:2000427)                   | 0.00797 | 0.05914          | -2.78   | 13.42          |
| ribosomal subunit export from nucleus (GO:0000054)                             | 0.01293 | 0.06483          | -3.08   | 13.38          |
| regulation of glial cell apoptotic process (GO:0034350)                        | 0.00698 | 0.05914          | -2.65   | 13.17          |
| positive regulation of nitric-oxide synthase biosynthetic process (GO:0051770) | 0.00996 | 0.06483          | -2.79   | 12.84          |

**Table S2 GO terms for CDK4/6i differentially expressed genes in the HPC cluster.**

| <b>HPC cluster   CDK4/6i downregulated genes   GO Biological Process</b> |             |                  |         |                |
|--------------------------------------------------------------------------|-------------|------------------|---------|----------------|
| Name                                                                     | p-value     | adjusted p-value | z score | combined score |
| mitochondrial electron transport, NADH to ubiquinone (GO:0006120)        | 2.75E-07    | 0.00001807       | -2.73   | 41.3           |
| mitochondrial ATP synthesis coupled electron transport (GO:0042775)      | 6.70E-10    | 1.62E-07         | -1.9    | 40.19          |
| DNA topological change (GO:0006265)                                      | 1.81E-07    | 0.00001588       | -2.48   | 38.54          |
| V(D)J recombination (GO:0033151)                                         | 0.00003847  | 0.0008432        | -3.28   | 33.34          |
| respiratory electron transport chain (GO:0022904)                        | 1.23E-09    | 1.62E-07         | -1.36   | 27.89          |
| DNA ligation (GO:0006266)                                                | 0.000001453 | 0.00004245       | -2.07   | 27.79          |
| apoptotic nuclear changes (GO:0030262)                                   | 0.000003022 | 0.00007949       | -1.91   | 24.29          |
| DNA ligation involved in DNA repair (GO:0051103)                         | 0.0001068   | 0.00216          | -2.5    | 22.89          |
| mitochondrial respiratory chain complex I biogenesis (GO:0097031)        | 0.000001028 | 0.00003862       | -1.58   | 21.76          |
| NADH dehydrogenase complex assembly (GO:0010257)                         | 0.000001028 | 0.00003862       | -1.57   | 21.7           |
| <b>HPC cluster   CDK4/6i upregulated genes   GO Biological Process</b>   |             |                  |         |                |
| Name                                                                     | p-value     | adjusted p-value | z score | combined score |
| regulated exocytosis (GO:0045055)                                        | 0.00002208  | 0.001921         | -2.3    | 24.7           |
| membrane raft assembly (GO:0001765)                                      | 0.002797    | 0.03577          | -3.89   | 22.88          |
| defense response to protozoan (GO:0042832)                               | 0.003595    | 0.03577          | -2.98   | 16.76          |
| platelet degranulation (GO:0002576)                                      | 0.00001305  | 0.001921         | -1.44   | 16.15          |
| membrane raft organization (GO:0031579)                                  | 0.004392    | 0.03577          | -2.96   | 16.05          |
| regulation of MHC class II biosynthetic process (GO:0045346)             | 0.003595    | 0.03577          | -2.73   | 15.38          |
| positive regulation of cAMP-mediated signaling (GO:0043950)              | 0.003595    | 0.03577          | -2.7    | 15.2           |
| positive regulation of macrophage differentiation (GO:0045651)           | 0.003595    | 0.03577          | -2.59   | 14.56          |
| genetic imprinting (GO:0071514)                                          | 0.003595    | 0.03577          | -2.57   | 14.45          |
| regulation of glycogen (starch) synthase activity (GO:2000465)           | 0.003196    | 0.03577          | -2.44   | 14.04          |

**Table S3 GO terms for CDK4/6i differentially expressed genes in the erythroid cluster.**

| <b>Erythroid cluster   CDK4/6i downregulated genes   GO Biological Process</b> |             |                  |         |                |
|--------------------------------------------------------------------------------|-------------|------------------|---------|----------------|
| Name                                                                           | p-value     | adjusted p-value | z score | combined score |
| mitochondrial ATP synthesis coupled electron transport (GO:0042775)            | 2.92E-10    | 1.25E-07         | -1.9    | 41.77          |
| mitochondrial electron transport, NADH to ubiquinone (GO:0006120)              | 0.000002073 | 0.0002228        | -2.73   | 35.77          |
| V(D)J recombination (GO:0033151)                                               | 0.000103    | 0.00492          | -3.28   | 30.13          |
| respiratory electron transport chain (GO:0022904)                              | 5.92E-10    | 1.27E-07         | -1.36   | 28.88          |
| mitochondrial respiratory chain complex assembly (GO:0033108)                  | 0.000001286 | 0.0001843        | -1.78   | 24.16          |
| DNA topological change (GO:0006265)                                            | 0.0001651   | 0.007099         | -2.47   | 21.54          |
| DNA geometric change (GO:0032392)                                              | 0.00001531  | 0.0008227        | -1.87   | 20.72          |
| DNA ligation involved in DNA repair (GO:0051103)                               | 0.0002851   | 0.009431         | -2.5    | 20.44          |
| mitochondrial respiratory chain complex I biogenesis (GO:0097031)              | 0.000007671 | 0.0004712        | -1.58   | 18.59          |
| NADH dehydrogenase complex assembly (GO:0010257)                               | 0.000007671 | 0.0004712        | -1.57   | 18.54          |
| <b>Erythroid cluster   CDK4/6i upregulated genes   GO Biological Process</b>   |             |                  |         |                |
| Name                                                                           | p-value     | adjusted p-value | z score | combined score |
| membrane raft assembly (GO:0001765)                                            | 0.004193    | 0.05535          | -3.89   | 21.31          |
| regulation of viral entry into host cell (GO:0046596)                          | 0.0001149   | 0.02343          | -1.89   | 17.14          |
| regulation of muscle system process (GO:0090257)                               | 0.005985    | 0.05535          | -2.94   | 15.05          |
| membrane raft organization (GO:0031579)                                        | 0.006582    | 0.05535          | -2.96   | 14.86          |
| genetic imprinting (GO:0071514)                                                | 0.005388    | 0.05535          | -2.57   | 13.41          |
| response to muscle stretch (GO:0035994)                                        | 0.005985    | 0.05535          | -2.57   | 13.14          |
| regulation of glycogen (starch) synthase activity (GO:2000465)                 | 0.004791    | 0.05535          | -2.44   | 13.05          |
| negative regulation of DNA metabolic process (GO:0051053)                      | 0.0003079   | 0.0314           | -1.52   | 12.28          |
| regulation of apoptotic process (GO:0042981)                                   | 0.001047    | 0.05535          | -1.79   | 12.27          |
| positive regulation of G1/S transition of mitotic cell cycle (GO:1900087)      | 0.01016     | 0.05535          | -2.66   | 12.22          |

**Table S4 GO terms for CDK4/6i differentially expressed genes in the mesenchymal cluster.**

| Mesenchymal cluster   CDK4/6i downregulated genes   GO Biological Process |             |                  |         |                |
|---------------------------------------------------------------------------|-------------|------------------|---------|----------------|
| Name                                                                      | p-value     | adjusted p-value | z score | combined score |
| mitochondrial electron transport, NADH to ubiquinone (GO:0006120)         | 0.000009682 | 0.000568         | -2.74   | 31.58          |
| mitochondrial ATP synthesis coupled electron transport (GO:0042775)       | 9.31E-07    | 0.0001222        | -1.9    | 26.42          |
| ribosomal small subunit export from nucleus (GO:0000056)                  | 0.006284    | 0.04096          | -4.16   | 21.09          |
| mitochondrial ATP synthesis coupled proton transport (GO:0042776)         | 0.01962     | 0.05571          | -4.94   | 19.43          |
| respiratory electron transport chain (GO:0022904)                         | 0.000001389 | 0.0001222        | -1.36   | 18.33          |
| mitochondrial respiratory chain complex I biogenesis (GO:0097031)         | 0.00002582  | 0.0007574        | -1.58   | 16.68          |
| NADH dehydrogenase complex assembly (GO:0010257)                          | 0.00002582  | 0.0007574        | -1.57   | 16.64          |
| mitochondrial respiratory chain complex assembly (GO:0033108)             | 0.00008825  | 0.002219         | -1.78   | 16.58          |
| V(D)J recombination (GO:0033151)                                          | 0.007179    | 0.04211          | -3.26   | 16.12          |
| mitochondrial respiratory chain complex I assembly (GO:0032981)           | 0.00002582  | 0.0007574        | -1.41   | 14.9           |

**Table S5 GO terms for CDK1i differentially expressed genes in the endothelial cluster.**

| <b>Endothelial cluster   CDK1i downregulated genes   GO Biological Process</b>                             |            |                  |         |                |
|------------------------------------------------------------------------------------------------------------|------------|------------------|---------|----------------|
| Name                                                                                                       | p-value    | adjusted p-value | z score | combined score |
| positive regulation of nitric-oxide synthase biosynthetic process (GO:0051770)                             | 0.0000383  | 0.01255          | -2.82   | 28.65          |
| regulation of nitric-oxide synthase biosynthetic process (GO:0051769)                                      | 0.00006628 | 0.01255          | -2.58   | 24.83          |
| ribosomal small subunit export from nucleus (GO:0000056)                                                   | 0.006632   | 0.05774          | -4.15   | 20.81          |
| mitochondrial ATP synthesis coupled proton transport (GO:0042776)                                          | 0.0207     | 0.05998          | -4.86   | 18.84          |
| positive regulation of activated T cell proliferation (GO:0042104)                                         | 0.0001608  | 0.01267          | -2.15   | 18.76          |
| positive regulation of cell migration by vascular endothelial growth factor signaling pathway (GO:0038089) | 0.007576   | 0.05774          | -3.47   | 16.95          |
| regulation of positive chemotaxis (GO:0050926)                                                             | 0.008519   | 0.05774          | -3.55   | 16.93          |
| protein kinase B signaling (GO:0043491)                                                                    | 0.0005284  | 0.02313          | -1.97   | 14.87          |
| response to type I interferon (GO:0034340)                                                                 | 0.007576   | 0.05774          | -2.95   | 14.4           |
| positive regulation of apoptotic cell clearance (GO:2000427)                                               | 0.007576   | 0.05774          | -2.76   | 13.47          |
| <b>Endothelial cluster   CDK1i upregulated genes   GO Biological Process</b>                               |            |                  |         |                |
| Name                                                                                                       | p-value    | adjusted p-value | z score | combined score |
| cytoskeleton-dependent intracellular transport (GO:0030705)                                                | 0.00007845 | 0.006058         | -2.09   | 19.73          |
| regulation of transcription from RNA polymerase II promoter in response to oxidative stress (GO:0043619)   | 0.004492   | 0.04395          | -3.6    | 19.45          |
| cell cycle G2/M phase transition (GO:0044839)                                                              | 0.00002973 | 0.005055         | -1.82   | 18.98          |
| V(D)J recombination (GO:0033151)                                                                           | 0.003994   | 0.04395          | -3.27   | 18.05          |
| regulation of mitotic cell cycle phase transition (GO:1901990)                                             | 0.00008908 | 0.006058         | -1.91   | 17.85          |
| outer mitochondrial membrane organization (GO:0007008)                                                     | 0.003994   | 0.04395          | -3.23   | 17.84          |
| regulation of G2/M transition of mitotic cell cycle (GO:0010389)                                           | 0.00004774 | 0.005411         | -1.77   | 17.61          |
| negative regulation of translation in response to stress (GO:0032055)                                      | 0.003495   | 0.04395          | -3.09   | 17.48          |
| regulation of translational initiation in response to stress (GO:0043558)                                  | 0.003495   | 0.04395          | -2.84   | 16.07          |
| regulation of nuclease activity (GO:0032069)                                                               | 0.003495   | 0.04395          | -2.83   | 15.99          |

**Table S6 GO terms for CDK1i differentially expressed genes in the HPC cluster.**

| <b>HPC cluster   CDK1i downregulated genes   GO Biological Process</b>      |             |                  |         |                |
|-----------------------------------------------------------------------------|-------------|------------------|---------|----------------|
| Name                                                                        | p-value     | adjusted p-value | z score | combined score |
| mitochondrial ATP synthesis coupled electron transport (GO:0042775)         | 8.30E-11    | 4.67E-08         | -1.9    | 44.16          |
| mitochondrial electron transport, NADH to ubiquinone (GO:0006120)           | 0.000001458 | 0.0001368        | -2.73   | 36.68          |
| respiratory electron transport chain (GO:0022904)                           | 2.06E-10    | 5.79E-08         | -1.36   | 30.32          |
| mitochondrial ATP synthesis coupled proton transport (GO:0042776)           | 0.003724    | 0.03913          | -4.95   | 27.71          |
| mitochondrial electron transport, cytochrome c to oxygen (GO:0006123)       | 0.0001003   | 0.002822         | -2.57   | 23.62          |
| mRNA splicing, via spliceosome (GO:0000398)                                 | 0.000001398 | 0.0001368        | -1.75   | 23.54          |
| histone mRNA metabolic process (GO:0008334)                                 | 0.0001484   | 0.003632         | -2.29   | 20.16          |
| gene expression (GO:0010467)                                                | 1.29E-07    | 0.00002419       | -1.26   | 19.94          |
| establishment of protein localization to mitochondrion (GO:0072655)         | 0.00005491  | 0.001932         | -2.02   | 19.86          |
| nucleocytoplasmic transport (GO:0006913)                                    | 0.00004293  | 0.001859         | -1.95   | 19.59          |
| <b>HPC cluster   CDK1i upregulated genes   GO Biological Process</b>        |             |                  |         |                |
| Name                                                                        | p-value     | adjusted p-value | z score | combined score |
| cellular iron ion homeostasis (GO:0006879)                                  | 0.000003262 | 0.0008498        | -2.65   | 33.52          |
| iron ion homeostasis (GO:0055072)                                           | 9.99E-08    | 0.00005206       | -1.57   | 25.36          |
| oxygen homeostasis (GO:0032364)                                             | 0.01253     | 0.09524          | -4.65   | 20.36          |
| positive regulation of cell cycle arrest (GO:0071158)                       | 0.00001468  | 0.001912         | -1.71   | 19.01          |
| ribosomal small subunit export from nucleus (GO:0000056)                    | 0.01253     | 0.09524          | -4.12   | 18.06          |
| gas homeostasis (GO:0033483)                                                | 0.01431     | 0.09524          | -4.11   | 17.47          |
| neutrophil degranulation (GO:0043312)                                       | 0.0001957   | 0.01014          | -2.01   | 17.14          |
| cellular transition metal ion homeostasis (GO:0046916)                      | 0.00002402  | 0.002503         | -1.59   | 16.88          |
| neutrophil mediated immunity (GO:0002446)                                   | 0.000214    | 0.01014          | -1.93   | 16.31          |
| DNA damage response, signal transduction by p53 class mediator (GO:0030330) | 0.00001468  | 0.001912         | -1.42   | 15.84          |

**Table S7 GO terms for CDK1i differentially expressed genes in the erythroid cluster.**

| <b>Erythroid cluster   CDK1i downregulated genes   GO Biological Process</b> |            |                  |         |                |
|------------------------------------------------------------------------------|------------|------------------|---------|----------------|
| Name                                                                         | p-value    | adjusted p-value | z score | combined score |
| regulation of protein targeting (GO:1903533)                                 | 0.005936   | 0.03332          | -4.26   | 21.86          |
| ribosomal small subunit export from nucleus (GO:0000056)                     | 0.005936   | 0.03332          | -4.17   | 21.37          |
| mitochondrial electron transport, NADH to ubiquinone (GO:0006120)            | 0.0007188  | 0.02581          | -2.74   | 19.8           |
| mitochondrial ATP synthesis coupled proton transport (GO:0042776)            | 0.01854    | 0.04191          | -4.96   | 19.77          |
| mitochondrial ATP synthesis coupled electron transport (GO:0042775)          | 0.00004997 | 0.003801         | -1.9    | 18.84          |
| folic acid-containing compound biosynthetic process (GO:0009396)             | 0.005936   | 0.03332          | -3.45   | 17.69          |
| oxygen transport (GO:0015671)                                                | 0.006781   | 0.03332          | -3.32   | 16.57          |
| positive regulation of autophagy of mitochondrion (GO:1903599)               | 0.006781   | 0.03332          | -3      | 15             |
| ribosomal subunit export from nucleus (GO:0000054)                           | 0.011      | 0.04056          | -3.08   | 13.89          |
| pteridine-containing compound biosynthetic process (GO:0042559)              | 0.006781   | 0.03332          | -2.68   | 13.41          |
| <b>Erythroid cluster   CDK1i upregulated genes   GO Biological Process</b>   |            |                  |         |                |
| Name                                                                         | p-value    | adjusted p-value | z score | combined score |
| negative regulation of membrane protein ectodomain proteolysis (GO:0051045)  | 0.003196   | 0.04232          | -2.66   | 15.26          |
| negative regulation of reproductive process (GO:2000242)                     | 0.004392   | 0.04232          | -2.54   | 13.81          |
| sequestering of actin monomers (GO:0042989)                                  | 0.004392   | 0.04232          | -2.43   | 13.17          |
| regulation of integrin-mediated signaling pathway (GO:2001044)               | 0.004791   | 0.04232          | -2.3    | 12.27          |
| regulation of trophoblast cell migration (GO:1901163)                        | 0.004791   | 0.04232          | -2.24   | 11.96          |
| negative regulation of DNA replication (GO:0008156)                          | 0.006781   | 0.04303          | -2.2    | 10.96          |
| positive regulation of viral entry into host cell (GO:0046598)               | 0.003595   | 0.04232          | -1.85   | 10.44          |
| transition metal ion homeostasis (GO:0055076)                                | 0.009958   | 0.04303          | -2.23   | 10.26          |
| cellular iron ion homeostasis (GO:0006879)                                   | 0.02258    | 0.0497           | -2.61   | 9.91           |
| negative regulation of actin filament polymerization (GO:0030837)            | 0.009165   | 0.04303          | -1.83   | 8.57           |

**Table S8 GO terms for CDK1i differentially expressed genes in the mesenchymal cluster.**

| Mesenchymal cluster   CDK1i downregulated genes   GO Biological Process |            |                  |         |                |
|-------------------------------------------------------------------------|------------|------------------|---------|----------------|
| Name                                                                    | p-value    | adjusted p-value | z score | combined score |
| ribosomal small subunit export from nucleus (GO:0000056)                | 0.005587   | 0.0459           | -4.17   | 21.63          |
| mitochondrial electron transport, NADH to ubiquinone (GO:0006120)       | 0.0006352  | 0.0305           | -2.74   | 20.14          |
| mitochondrial ATP synthesis coupled proton transport (GO:0042776)       | 0.01746    | 0.05732          | -4.96   | 20.08          |
| mitochondrial ATP synthesis coupled electron transport (GO:0042775)     | 0.00004128 | 0.004197         | -1.9    | 19.21          |
| bleb assembly (GO:0032060)                                              | 0.006383   | 0.0459           | -3      | 15.15          |
| ribosomal subunit export from nucleus (GO:0000054)                      | 0.01035    | 0.05579          | -3.08   | 14.08          |
| respiratory electron transport chain (GO:0022904)                       | 0.00005559 | 0.004197         | -1.36   | 13.32          |
| genetic imprinting (GO:0071514)                                         | 0.007178   | 0.04927          | -2.56   | 12.64          |
| regulation of glycogen (starch) synthase activity (GO:2000465)          | 0.006383   | 0.0459           | -2.43   | 12.27          |
| protein targeting to ER (GO:0045047)                                    | 0.002727   | 0.03956          | -2.08   | 12.26          |
